# Supplementary material for: Klebsiella pneumoniae and Colistin Susceptibility Testing: Performance Evaluation for Broth Microdilution, Agar Dilution and Minimum Inhibitory Concentration Test Strips and Impact of the “Skipped Well” Phenomenon
Source: MDPI journal article supplement (doi:10.3390/diagnostics11122352), 2021-12-14
Supplement: s1 [file s1]

**Supplementary Table S1** - Features of *Klebsiella pneumoniae* isolates used in this article and colistin susceptibility results by broth microdilution, agar dilution and Minimum inhibitory concentration Test Strips (MTS).

| Strain | ST      | Year of Isolation | Environmental/<br>Biological source | Broth microdilution MIC (µg/mL) (Skipped wells) |                             |                  | Agar dilution MIC (µg/mL) |           |           | MTS MIC (µg/mL) |
|--------|---------|-------------------|-------------------------------------|-------------------------------------------------|-----------------------------|------------------|---------------------------|-----------|-----------|-----------------|
|        |         |                   |                                     | Replica A                                       | Replica B                   | Replica C        | Replica A                 | Replica B | Replica C |                 |
| KP684  | ST25    | 1999              | Urine                               | 0.5                                             | 0.25                        | 0.25             | 0.5                       | 0.5       | 0.25      | 1.0             |
| KP4129 | ST14    | 1980              | Ear                                 | 8.0                                             | 8.0                         | 4.0              | 0.25                      | 0.25      | 0.25      | 1.0             |
| KP4151 | ST252   | 1980              | Pharyngeal exudate                  | 0.25                                            | ND (0.25 and 1.0)           | ND (0.25-2.0)    | 0.25                      | 0.25      | 0.25      | -               |
| KP4164 | ST20    | 1980              | Bath                                | ND (1.0; 4.0 and 8.0)                           | >16.0                       | >16.0            | 0.25                      | 0.25      | 0.25      | 0.75            |
| KP4228 | Unknown | 1980              | Urine                               | 0.25                                            | 0.25                        | ND (0.5-4.0)     | 0.25                      | 0.25      | 0.25      | 1.0             |
| KP4246 | ST15    | 1980              | Urine                               | 1.0 (0.25)                                      | 0.5                         | 0.5              | 0.25                      | 0.25      | 0.25      | 0.38            |
| KP4247 | ST15    | 1980              | Urine                               | 8.0(0.25)                                       | 0.25                        | ND (0.5-4.0)     | 0.25                      | 0.25      | 0.25      | -               |
| KP4248 | ST3     | 1980              | Bronchial secretion                 | ND (0.5 and 1.0)                                | ND (0.5-2.0)                | ND (1.0 and 2.0) | 0.5                       | 0.5       | 0.5       | -               |
| KP4254 | ST15    | 1980              | Urine                               | ND (0.25 and 0.5)                               | ND (0.25 and 1.0)           | ND (0.5- 2.0)    | 0.25                      | 0.25      | 0.25      | -               |
| KP4256 | ST37    | 1980              | Urine                               | 0.25                                            | 0.25                        | 0.25             | 0.25                      | 0.5       | 0.25      | 1.5             |
| KP4257 | ST15    | 1980              | Urine                               | >16.0                                           | >16.0                       | 16.0             | 0.25                      | 0.25      | 0.25      | 0.75            |
| KP4171 | ST1728  | 1981              | Belly button                        | ND (0.25 and 0.5)                               | ND (0.25; 1.0; 2.0 and 8.0) | 1.06 (4.0)       | 0.25                      | 0.25      | 0.25      | -               |
| KP4184 | ST37    | 1981              | Pharyngeal exudate                  | 0.25                                            | ND (0.25-4.0)               | ND (0.25-1.0)    | 0.25                      | 0.25      | 0.25      | -               |
| KP4212 | ST15    | 1981              | Brush                               | 0.25                                            | ND (0.5; 1.0)               | 0.5              | 0.25                      | 0.25      | 0.25      | -               |
| KP4214 | ST2493  | 1981              | Bench                               | ND (0.25; 0.5 and 4.0)                          | ND (0.5 and 1.0)            | 0.25             | 0.25                      | 0.25      | 2.0       | -               |
| KP4263 | ST15    | 1981              | Urine                               | ND (0.5-8.0)                                    | 2.0                         | 4.0 (1.0)        | 0.5                       | 0.5       | 0.5       | -               |
| KP4264 | Unknown | 1981              | Urine                               | 0.5                                             | 0.5                         | 0.5              | 0.25                      | 0.25      | 0.25      | 1.0             |
| KP4265 | Unknown | 1981              | Urine                               | 0.5                                             | 0.25                        | 0.5              | 0.5                       | 0.5       | 0.5       | 1.0             |
| KP4194 | ST37    | 1982              | Pharyngeal exudate                  | ND (0.25 and 0.5)                               | 0.25                        | 0.25             | 0.25                      | 0.25      | 0.25      | 1.0             |
| KP4195 | ST15    | 1982              | Feces                               | 1.0                                             | 1.0                         | 1.0              | 0.25                      | 0.25      | 0.25      | 0.75            |

Supplementary Table S1 - continued

| Strain | ST      | Year of Isolation | Environmental/<br>Biological source | Broth microdilution MIC (µg/mL) (Skipped wells) |                        |                   | Agar dilution MIC (µg/mL) |           |           | MTS MIC (µg/mL) |
|--------|---------|-------------------|-------------------------------------|-------------------------------------------------|------------------------|-------------------|---------------------------|-----------|-----------|-----------------|
|        |         |                   |                                     | Replica A                                       | Replica B              | Replica C         | Replica A                 | Replica B | Replica C |                 |
| KP4197 | ST1799  | 1982              | Feces                               | 0.25                                            | 0.25                   | 0.25              | 0.25                      | 0.25      | 0.25      | 1.0             |
| KP4279 | ST13    | 1982              | Catheter                            | 0.25                                            | 0.25                   | 0.25              | 0.25                      | 0.25      | 0.25      | 1.5             |
| KP4287 | ST25    | 1982              | -                                   | 0.25                                            | 0.25                   | 0.5               | 0.25                      | 0.25      | 0.25      | 1.0             |
| KP4292 | ST70    | 1995              | Blood                               | 0.5                                             | 0.25                   | 0.25              | 0.25                      | 0.25      | 0.25      | 1.0             |
| KP4297 | ST25    | 1995              | Blood                               | 0.5                                             | ND (0.25-1.0)          | 0.25              | 0.5                       | 0.5       | 0.5       | -               |
| KP4325 | ST25    | 1995              | Blood                               | ND (0.5 and 1.0)                                | 0.5                    | ND (0.5 and 1.0)  | 0.25                      | 0.25      | 0.25      | -               |
| KP4333 | ST252   | 1995              | Blood                               | 0.25                                            | ND (0.25; 1.0 and 2.0) | 0.25              | 0.5                       | 0.5       | 0.25      | 1.0             |
| KP4367 | ST25    | 1995              | Ascitic fluid                       | 0.25                                            | 0.25                   | 0.25              | 0.25                      | 0.25      | 0.25      | 1.5             |
| KP4378 | ST147   | 1995              | Blood                               | 0.25                                            | 0.5                    | ND (0.25-1.0)     | 0.25                      | 0.25      | 0.25      | -               |
| KP4387 | ST158   | 1995              | Blood                               | 0.25                                            | 0.25                   | 0.25              | 0.5                       | 0.5       | 0.5       | 0.75            |
| KP4389 | ST25    | 1995              | Blood                               | 4.0 (1.0)                                       | 0.5                    | ND (0.25 and 0.5) | 0.25                      | 0.25      | 0.25      | -               |
| KP4408 | ST25    | 1996              | Blood                               | 0.25                                            | 0.25                   | 0.25              | 0.5                       | 0.25      | 0.25      | 1.0             |
| KP689  | ST25    | 1999              | Blood                               | 0.25                                            | 0.25                   | 0.25              | 0.25                      | 0.25      | 0.25      | 1.0             |
| KP725  | ST12    | 1999              | Blood                               | 0.25                                            | 0.25                   | 0.25              | 0.25                      | 0.25      | 0.25      | 0.75            |
| KP730  | ST20    | 2000              | Blood                               | ND (0.5 and 1.0)                                | ND (0.25-4.0)          | ND (0.25 and 0.5) | 0.5                       | 0.25      | 0.25      | -               |
| KP748  | ST14    | 2001              | Blood                               | 0.25                                            | 0.25                   | 0.25              | 0.25                      | 0.25      | 0.25      | 1.0             |
| KP776  | ST45    | 2001              | Blood                               | 0.25                                            | 0.25                   | 0.25              | 0.25                      | 0.5       | 0.25      | 1.0             |
| KP804  | Unknown | 2002              | Blood                               | 0.25                                            | 0.25                   | 0.25              | 0.25                      | 0.25      | 0.25      | 1.0             |
| KP809  | ST12    | 2002              | Blood                               | ND (0.25-1.0)                                   | 1.0                    | ND (0.25 and 0.5) | 0.25                      | 0.25      | 0.25      | -               |
| KP828  | ST12    | 2002              | Blood                               | 0.25                                            | 0.25                   | 0.25              | 0.25                      | 0.25      | 0.25      | 1.0             |
| KP829  | ST12    | 2003              | Blood                               | 0.25                                            | 0.25                   | ND (0.25-8.0)     | 0.25                      | 0.25      | 0.25      | 1.0             |
| KP840  | ST43    | 2003              | Blood                               | 1.0                                             | 1.0                    | 2.0               | 0.5                       | 0.5       | 0.5       | 0.75            |

**Supplementary Table S1 – continued**

[illegible]

**Supplementary Table S1 – continued**

| Strain | ST     | Year of Isolation | Environmental/<br>Biological source | Broth microdilution MIC (µg/mL) (Skipped wells) |                   |           | Agar dilution MIC (µg/mL) |           |           | MTS MIC (µg/mL) |
|--------|--------|-------------------|-------------------------------------|-------------------------------------------------|-------------------|-----------|---------------------------|-----------|-----------|-----------------|
|        |        |                   |                                     | Replica A                                       | Replica B         | Replica C | Replica A                 | Replica B | Replica C |                 |
| KP1363 | ST15   | 2005              | Blood                               | 0.25                                            | 0.5               | 0.25      | 0.25                      | 0.25      | 0.25      | 1.0             |
| KP1144 | ST15   | 2006              | Blood                               | 0.25                                            | ND (0.25 and 0.5) | 0.25      | 0.25                      | 0.25      | 0.5       | 1.0             |
| KP1209 | ST35   | 2006              | Blood                               | 0.25                                            | 0.25              | 0.25      | 0.25                      | 0.25      | 0.25      | 1.0             |
| KP1264 | ST15   | 2007              | Blood                               | 0.25                                            | 1.0 (0.25)        | 0.5       | 0.25                      | 0.25      | 0.25      | -               |
| KP1495 | ST147  | 2007              | Blood                               | 0.25                                            | 0.25              | 0.25      | 0.25                      | 0.25      | 0.25      | 0.75            |
| KP1507 | ST133  | 2007              | Blood                               | 1.0                                             | 1.0               | 1.0       | 0.25                      | 0.25      | 0.25      | 0.75            |
| KP1528 | ST39   | 2007              | Blood                               | 0.25                                            | ND (0.25 and 0.5) | 0.25      | 0.5                       | 0.5       | 0.5       | 1.0             |
| KP1675 | ST48   | 2008              | Blood                               | 0.25                                            | 0.25              | 0.25      | 0.25                      | 0.25      | 0.25      | 1.0             |
| KP1924 | ST336  | 2008              | Blood                               | 2.0                                             | 2.0               | 1.0       | 0.25                      | 0.25      | 0.5       | 1.0             |
| KP1938 | ST15   | 2008              | Blood                               | 1.0                                             | 1.0               | 1.0       | 0.25                      | 0.25      | 0.25      | 0.75            |
| KP1990 | ST29   | 2008              | Blood                               | 1.0                                             | 4.0 (1.0)         | 1.0       | 0.25                      | 0.25      | 0.25      | 1.0             |
| KP2162 | ST336  | 2008              | Blood                               | 0.25                                            | 0.25              | 0.25      | 0.25                      | 0.25      | 0.25      | 1.0             |
| KP2169 | ST15   | 2008              | Blood                               | ND (1.0 and 2.0)                                | 8.0 (1.0)         | 2.0       | 0.25                      | 0.25      | 0.25      | -               |
| KP2200 | ST336  | 2008              | Blood                               | 1.0                                             | 1.0               | 1.0       | 0.25                      | 0.25      | 0.25      | 1.0             |
| KP2209 | ST133  | 2008              | Urine                               | 0.25                                            | 1.0 (0.25)        | 0.25      | 0.25                      | 0.25      | 0.25      | 1.0             |
| KP2224 | ST2176 | 2008              | Blood                               | 1.0                                             | 2.0               | 1.0       | 0.5                       | 0.5       | 0.5       | 1.0             |
| KP2287 | ST15   | 2008              | Blood                               | 1.0                                             | 1.0               | 1.0       | 0.25                      | 0.25      | 0.25      | 1.0             |
| KP2334 | ST20   | 2008              | Blood                               | 1.0                                             | 1.0               | 1.0       | 0.25                      | 0.25      | 0.25      | 1.0             |
| KP2447 | ST730  | 2008              | Blood                               | 1.0                                             | ND (1.0 and 2.0)  | 1.0       | 0.25                      | 0.25      | 0.25      | 1.0             |
| KP2454 | ST231  | 2008              | Blood                               | 0.25                                            | 0.25              | 0.25      | 0.25                      | 0.25      | 0.25      | 1.0             |
| KP2463 | ST218  | 2009              | Blood                               | 1.0                                             | 1.0               | 1.0       | 0.5                       | 0.5       | 0.5       | 1.5             |
| KP2476 | ST13   | 2009              | Blood                               | 1.0                                             | ND (1.0 and 2.0)  | 1.0       | 0.25                      | 0.25      | 0.25      | 1.5             |

**Supplementary Table S1 – continued**

| Strain | ST     | Year of Isolation | Environmental/<br>Biological source | Broth microdilution MIC (µg/mL) (Skipped wells) |                  |                  | Agar dilution MIC (µg/mL) |           |           | MTS MIC (µg/mL) |
|--------|--------|-------------------|-------------------------------------|-------------------------------------------------|------------------|------------------|---------------------------|-----------|-----------|-----------------|
|        |        |                   |                                     | Replica A                                       | Replica B        | Replica C        | Replica A                 | Replica B | Replica C |                 |
| KP2497 | ST134  | 2009              | Blood                               | 1.0                                             | 1.0              | 1.0              | 0.25                      | 0.5       | 0.25      | 1.0             |
| KP2564 | ST11   | 2009              | Blood                               | 1.0                                             | 1.0              | 1.0              | 0.25                      | 0.25      | 0.25      | 1.0             |
| KP2568 | ST336  | 2009              | Blood                               | 1.0                                             | ND (1.0 and 2.0) | 1.0              | 0.5                       | 0.5       | 0.5       | 1.5             |
| KP2587 | ST336  | 2009              | Blood                               | 1.0                                             | 1.0              | 1.0              | 0.5                       | 0.5       | 0.5       | 1.5             |
| KP2605 | ST336  | 2009              | Blood                               | 1.0                                             | 1.0              | 1.0              | 0.5                       | 0.5       | 0.5       | 1.5             |
| KP2606 | ST336  | 2009              | Blood                               | 1.0                                             | 1.0              | 1.0              | 0.5                       | 0.5       | 0.5       | 1.5             |
| KP2645 | ST13   | 2009              | Blood                               | 1.0                                             | 1.0              | 1.0              | 0.25                      | 0.25      | 0.25      | 1.5             |
| KP2786 | ST152  | 2009              | Blood                               | 2.0                                             | 1.0              | 1.0              | 0.5                       | 0.25      | 0.5       | 1.5             |
| KP2864 | ST1801 | 2009              | Blood                               | 1.0                                             | 1.0              | 1.0              | 0.5                       | 0.5       | 0.5       | 1.0             |
| KP2895 | ST726  | 2009              | Blood                               | 2.0                                             | 1.0              | 1.0              | 0.5                       | 0.5       | 0.5       | 1.5             |
| KP2948 | ST14   | 2010              | Pus                                 | 2.0                                             | 1.0              | 1.0              | 0.5                       | 0.5       | 0.5       | 1.0             |
| KP2958 | ST76   | 2010              | Blood                               | 0.25                                            | 0.25             | 0.25             | 0.25                      | 0.25      | 0.25      | 1.5             |
| KP3000 | ST231  | 2010              | Blood                               | 1.0                                             | 1.0              | 1.0              | 0.5                       | 0.5       | 0.5       | 1.0             |
| KP3046 | ST14   | 2010              | Blood                               | 1.0                                             | 1.0              | 1.0              | 0.5                       | 0.5       | 0.5       | 1.0             |
| KP3185 | ST15   | 2010              | Blood                               | 1.0                                             | 1.0              | ND (2.0-8.0)     | 0.5                       | 0.5       | 0.5       | 1.5             |
| KP3270 | ST348  | 2011              | Blood                               | 0.25                                            | 0.25             | 0.25             | 0.25                      | 0.25      | 0.25      | 1.0             |
| KP3292 | ST15   | 2011              | Blood                               | 1.06 (4.0)                                      | 1.06 (2.0)       | 8.0              | 0.5                       | 0.5       | 0.5       | 1.0             |
| KP3323 | ST11   | 2011              | Blood                               | 1.0                                             | 1.0              | 1.0              | 0.5                       | 0.5       | 0.5       | 1.0             |
| KP3396 | ST39   | 2011              | Blood                               | ND (2.0 and 4.0)                                | 1.0              | ND (1.0 and 2.0) | 0.5                       | 0.5       | 0.5       | -               |
| KP3509 | ST15   | 2011              | Urine                               | 1.0                                             | 1.0              | 1.0              | 0.5                       | 0.5       | 0.5       | 1.0             |
| KP3635 | ST15   | 2011              | Blood                               | 1.0                                             | ND (1.0-4.0)     | 2.0              | 0.25                      | 0.25      | 0.25      | -               |
| KP3660 | ST70   | 2011              | Blood                               | 1.0                                             | 1.0              | 1.0              | 0.25                      | 0.25      | 0.5       | 0.25            |
| KP3715 | ST405  | 2011              | Blood                               | 1.0                                             | ND (1.0-8.0)     | 8.0 (2.0)        | 0.5                       | 0.5       | 0.5       | -               |

**Supplementary Table S1 – continued**

| Strain | ST    | Year of Isolation | Environmental/<br>Biological source | Broth microdilution MIC (µg/mL) (Skipped wells) |              |                       | Agar dilution MIC (µg/mL) |           |           | MTS MIC (µg/mL) |
|--------|-------|-------------------|-------------------------------------|-------------------------------------------------|--------------|-----------------------|---------------------------|-----------|-----------|-----------------|
|        |       |                   |                                     | Replica A                                       | Replica B    | Replica C             | Replica A                 | Replica B | Replica C |                 |
| KP3725 | ST11  | 2011              | Blood                               | 1.0                                             | 4.0          | 1.0                   | 0.25                      | 0.25      | 0.25      | 1.0             |
| KP4869 | ST15  | 2011              | Blood                               | 1.0                                             | 1.0          | ND (1.0-4.0)          | 0.25                      | 0.25      | 0.25      | 1.0             |
| KP3851 | ST348 | 2012              | Blood                               | 2.0                                             | 1.0          | 2.0                   | 0.5                       | 0.5       | 0.5       | 1.0             |
| KP3860 | ST307 | 2013              | Blood                               | 0.25                                            | 0.25         | 1.0 (0.25)            | 0.25                      | 0.25      | 0.25      | 1.0             |
| KP4845 | ST15  | 2013              | Rectal                              | ND (1.0-8.0)                                    | 1.0          | 2.0                   | 0.25                      | 0.25      | 0.25      | -               |
| KP4852 | ST960 | 2013              | Urine                               | 4.0                                             | 2.0          | ND (1.0; 2.0 and 8.0) | 0.5                       | 0.5       | 0.5       | -               |
| KP4855 | ST37  | 2013              | Bronchial secretion                 | 1.0                                             | ND (1.0-4.0) | 1.0                   | 0.5                       | 0.5       | 0.5       | 0.75            |
| KP4856 | ST348 | 2014              | Rectal                              | 1.0                                             | 1.0          | 1.0                   | 0.25                      | 0.25      | 0.25      | 0.75            |
| KP4857 | ST15  | 2014              | Rectal                              | 2.0                                             | 1.0          | 1.0                   | 0.5                       | 0.5       | 0.5       | 96.0            |
| KP4859 | ST423 | 2014              | Urine                               | 4.0                                             | 2.0          | 1.0                   | 0.5                       | 0.5       | 0.5       | -               |
| KP4860 | ST307 | 2014              | Rectal                              | 1.0                                             | 2.0          | 2.0                   | 0.5                       | 0.5       | 0.5       | 1.0             |
| KP4861 | ST17  | 2014              | Rectal                              | 1.0                                             | 2.0          | 2.0                   | 0.5                       | 0.5       | 0.5       | 0.75            |
| KP4862 | ST348 | 2014              | Catheter                            | 1.0                                             | 1.0          | 1.0                   | 0.5                       | 0.5       | 0.5       | 1.0             |
| KP4864 | ST35  | 2015              | Urine                               | 1.0                                             | 1.0          | 1.0                   | 0.5                       | 0.5       | 0.5       | 1.5             |
| KP4865 | ST70  | 2015              | Urine                               | 1.0                                             | 1.0          | 1.0                   | 0.25                      | 0.25      | 0.25      | 0.5             |
| KP4871 | ST307 | 2015              | Blood                               | 1.0                                             | 1.0          | 1.0                   | 0.5                       | 0.5       | 0.5       | 0.75            |
| KP4878 | ST307 | 2015              | Rectal                              | 2.0                                             | 1.0          | 1.0                   | 0.5                       | 0.5       | 0.5       | 1.5             |
| KP4882 | ST147 | 2016              | Rectal                              | 2.0                                             | 2.0          | 1.0                   | 0.5                       | 0.5       | 0.5       | 0.75            |
| KP4884 | ST147 | 2016              | Rectal                              | >16.0                                           | >16.0        | >16.0                 | 0.5                       | 0.5       | 0.5       | 1.0             |
| KP4886 | ST147 | 2016              | Rectal                              | 1.0                                             | 1.0          | 2.0                   | 0.5                       | 0.5       | 0.5       | 1.0             |
| KP4887 | ST147 | 2016              | Rectal                              | 1.0                                             | 1.0          | 1.0                   | 0.5                       | 0.5       | 0.5       | 1.0             |
| KP4889 | ST307 | 2017              | -                                   | >16.0                                           | >16.0        | >16.0                 | >16.0                     | >16.0     | >16.0     | 8.0             |
| KP5505 | ST13  | 2019              | Pus                                 | >16.0                                           | >16.0        | >16.0                 | 16.0                      | 16.0      | 16.0      | 1.5             |

**Supplementary Table S1 – continued**

| Strain | ST   | Year of Isolation | Environmental/<br>Biological source | Broth microdilution MIC (µg/mL) (Skipped wells) |           |           | Agar dilution MIC (µg/mL) |           |           | MTS MIC (µg/mL) |
|--------|------|-------------------|-------------------------------------|-------------------------------------------------|-----------|-----------|---------------------------|-----------|-----------|-----------------|
|        |      |                   |                                     | Replica A                                       | Replica B | Replica C | Replica A                 | Replica B | Replica C |                 |
| KP5506 | ST17 | 2019              | Urine                               | >16.0                                           | >16.0     | >16.0     | 16.0                      | 16.0      | 16.0      | 1.0             |
| KP5508 | ST13 | 2019              | Urine                               | >16.0                                           | >16.0     | >16.0     | 8.0                       | 8.0       | 8.0       | 8.0             |
| KP5509 | ST17 | 2019              | Urine                               | >16.0                                           | >16.0     | >16.0     | >16.0                     | >16.0     | >16.0     | >256            |
| KP5510 | ST13 | 2019              | Blood                               | >16.0                                           | >16.0     | >16.0     | 16.0                      | 16.0      | 16.0      | 8.0             |
| KP5511 | ST17 | 2019              | Blood                               | >16.0                                           | >16.0     | >16.0     | 8.0                       | 8.0       | 8.0       | 2.0             |
| KP5513 | ST13 | 2019              | Urine                               | 16.0                                            | 16.0      | 16.0      | 8.0                       | 8.0       | 8.0       | 1.0             |
| KP5514 | ST13 | 2019              | Urine                               | >16.0                                           | >16.0     | >16.0     | >16.0                     | >16.0     | >16.0     | 3.0             |
| KP5516 | ST13 | 2019              | Pharyngeal abscess                  | >16.0                                           | >16.0     | >16.0     | 16.0                      | 16.0      | 16.0      | 2.0             |
| KP5520 | ST13 | 2019              | Blood                               | 16.0                                            | 4.0       | 16.0      | 0.5                       | 0.5       | 0.5       | 1.0             |

MTS - Minimum Inhibitory Concentration Test Strips; Resistant and undetermined MIC isolates are highlighted in light blue and grey, respectively.
