# Supplementary material for: Klebsiella pneumoniae and Colistin Susceptibility Testing: Performance Evaluation for Broth Microdilution, Agar Dilution and Minimum Inhibitory Concentration Test Strips and Impact of the “Skipped Well” Phenomenon
Source: MDPI journal article supplement (doi:10.3390/diagnostics11122352), 2021-12-14
Supplement: s1 [file s1]

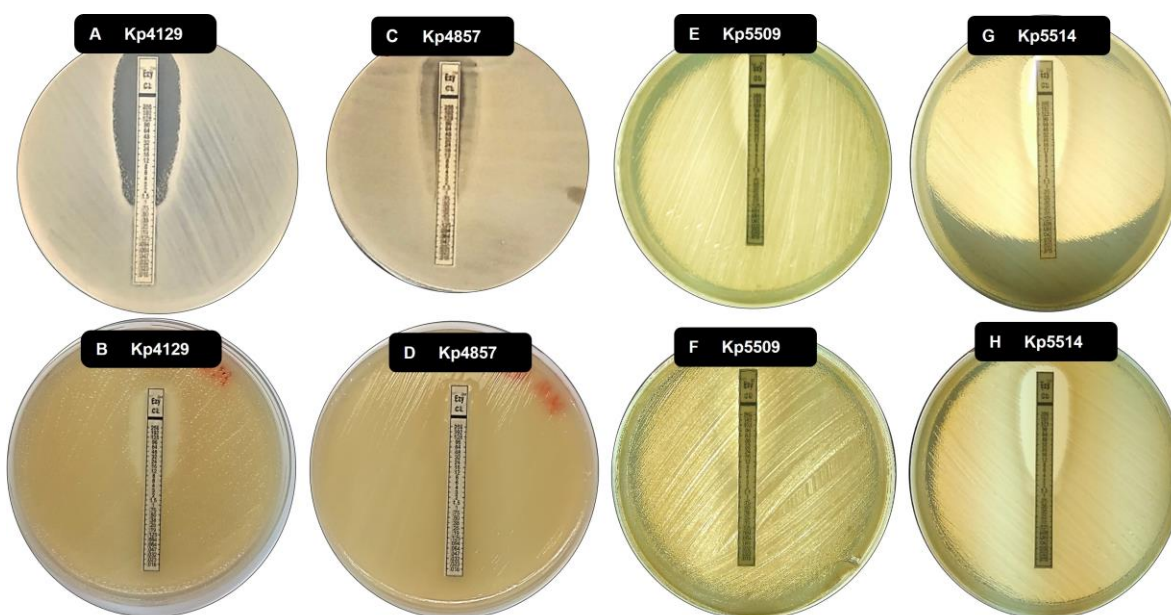

Figure S1: Colistin MTS results of Kp4129 (A); Kp4129 resistant subpopulation (6 g/mL) (B); Kp4857 (C); Kp4857 resistant subpopulation (>256 g/mL) (D); Kp5509 (E); Kp5509 resistant subpopulation (>256 g/mL) (F) Kp5514 (G); Kp5514 resistant subpopulation (H)
